# Supplementary material for: Exploring promising gas sensing and highly active catalysts for CO oxidation: transition-metal (Fe, Co and Ni) adsorbed Janus MoSSe monolayers
Source: Royal Society of Chemistry journal article supplement (doi:10.1039/d1cp00994j), 2021-01-01
Supplement: d1cp00994j1.pdf [file d1cp00994j1.pdf]

## Electronic Supplementary Information (ESI)

### Exploring promising gas sensing and highly active catalysts for CO oxidation: transition-metal (Fe, Co and Ni) adsorbed Janus MoSSe monolayer

Jia-Xing Guo,<sup>\*a</sup> Shao-Yi Wu,<sup>\*a</sup> Si-Ying Zhong,<sup>a</sup> Gao-Jun Zhang,<sup>a</sup> Xing-Yuan Yu<sup>a</sup> and Li-Na Wu<sup>b</sup>

<sup>a</sup> School of Physics, University of Electronic Science and Technology of China, Chengdu 611731, China. E-mail:

*guojx518@163.com, wushaoyi@uestc.edu.cn*

<sup>b</sup> School of Sciences, Xi'an Technological University, Xi'an 710021, China

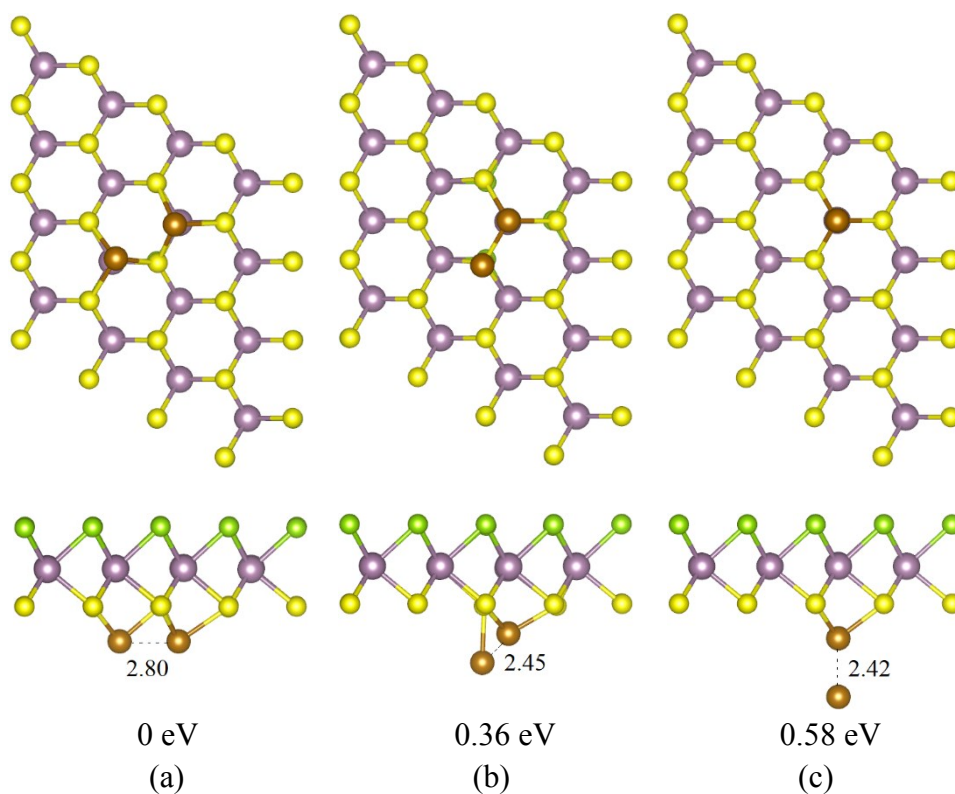

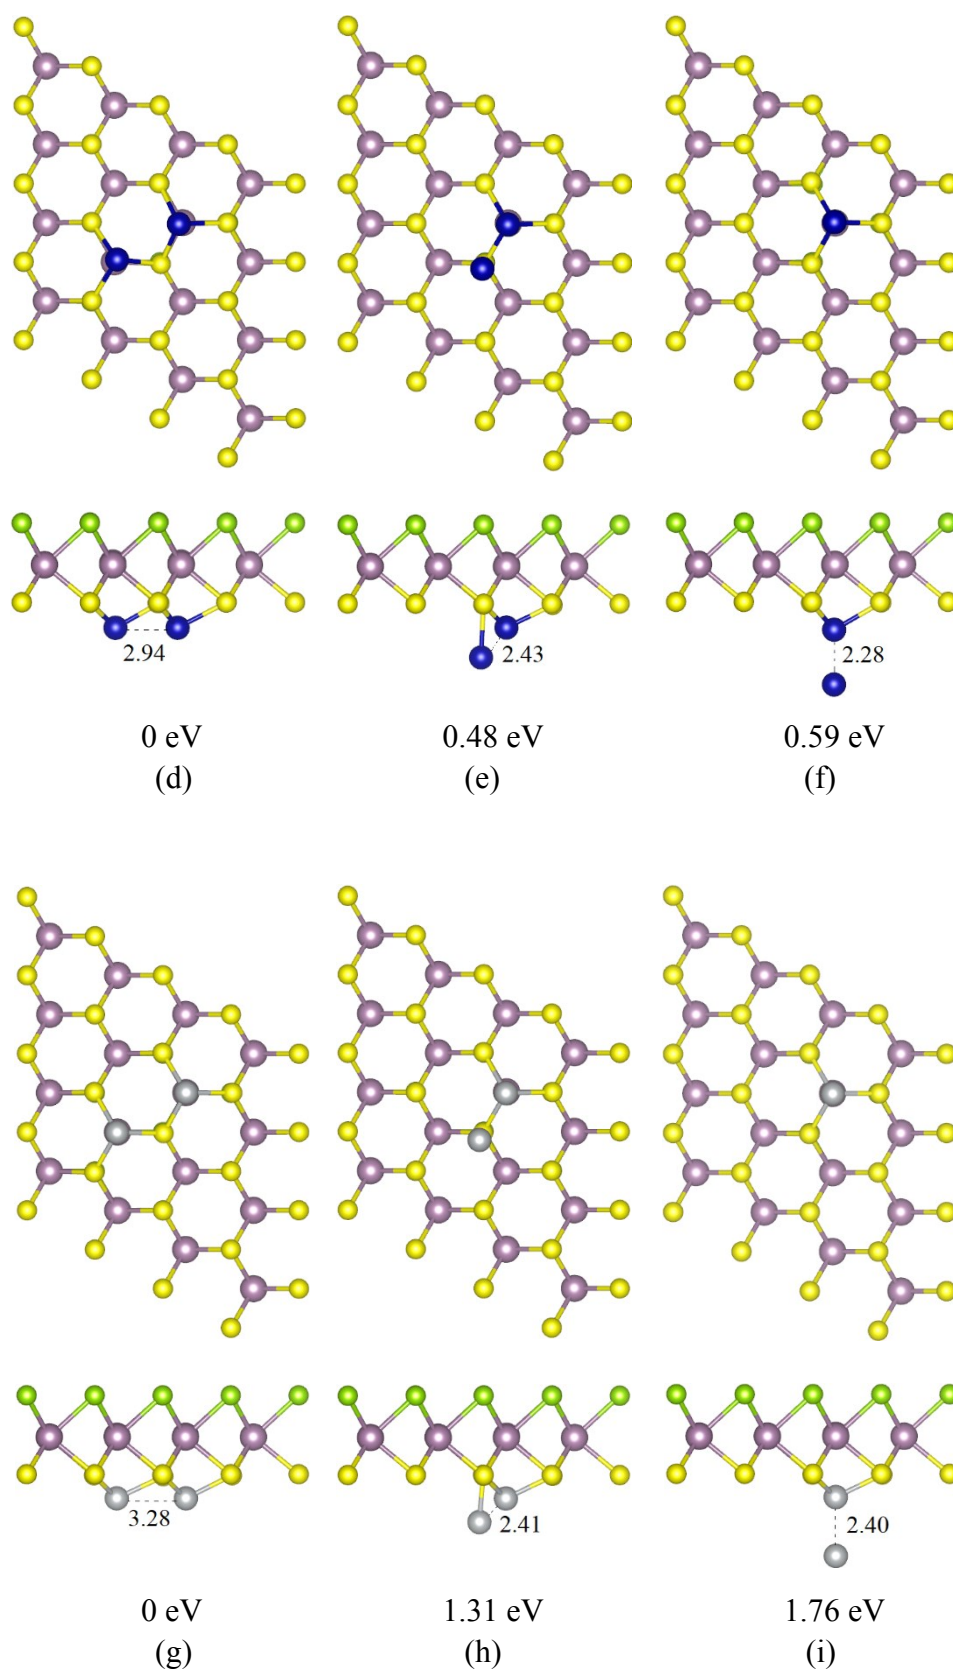

**Fig. S1** The top and side view of two Fe ((a), (b) and (c)), Co ((d), (e) and (f)) and Ni ((g), (h) and (i)) atoms adsorbed on Janus MoSSe monolayer. All bond lengths are in Å. The relative energies (eV) are also given.
